# Supplementary material
Source: Springer Nature journal article supplement (https://www.springerprofessional.de/resource/supplementary/13638_2013_859_MOESM1_ESM.pdf/11898794)

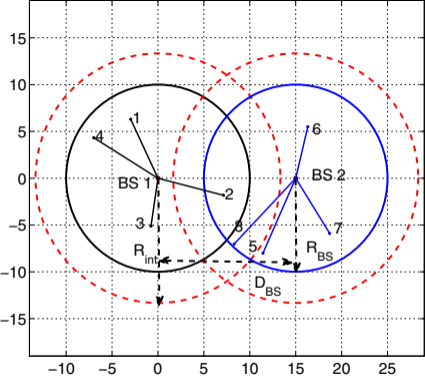

(a)

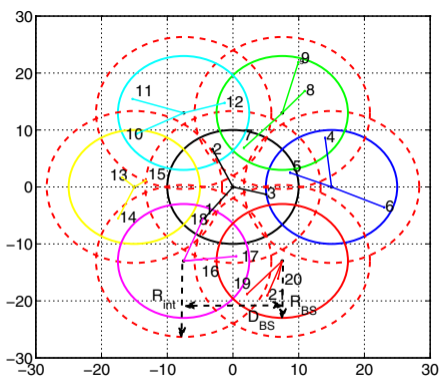

(b)

Supplement: MOESM1 [file 11898794]
